# Supplementary material
Source: PubMed Central journal article supplement (PMC3927835)
Supplement: NIHMS515048-supplement-Supplementary_Figure.pdf [file NIHMS515048-supplement-Supplementary_Figure.pdf]

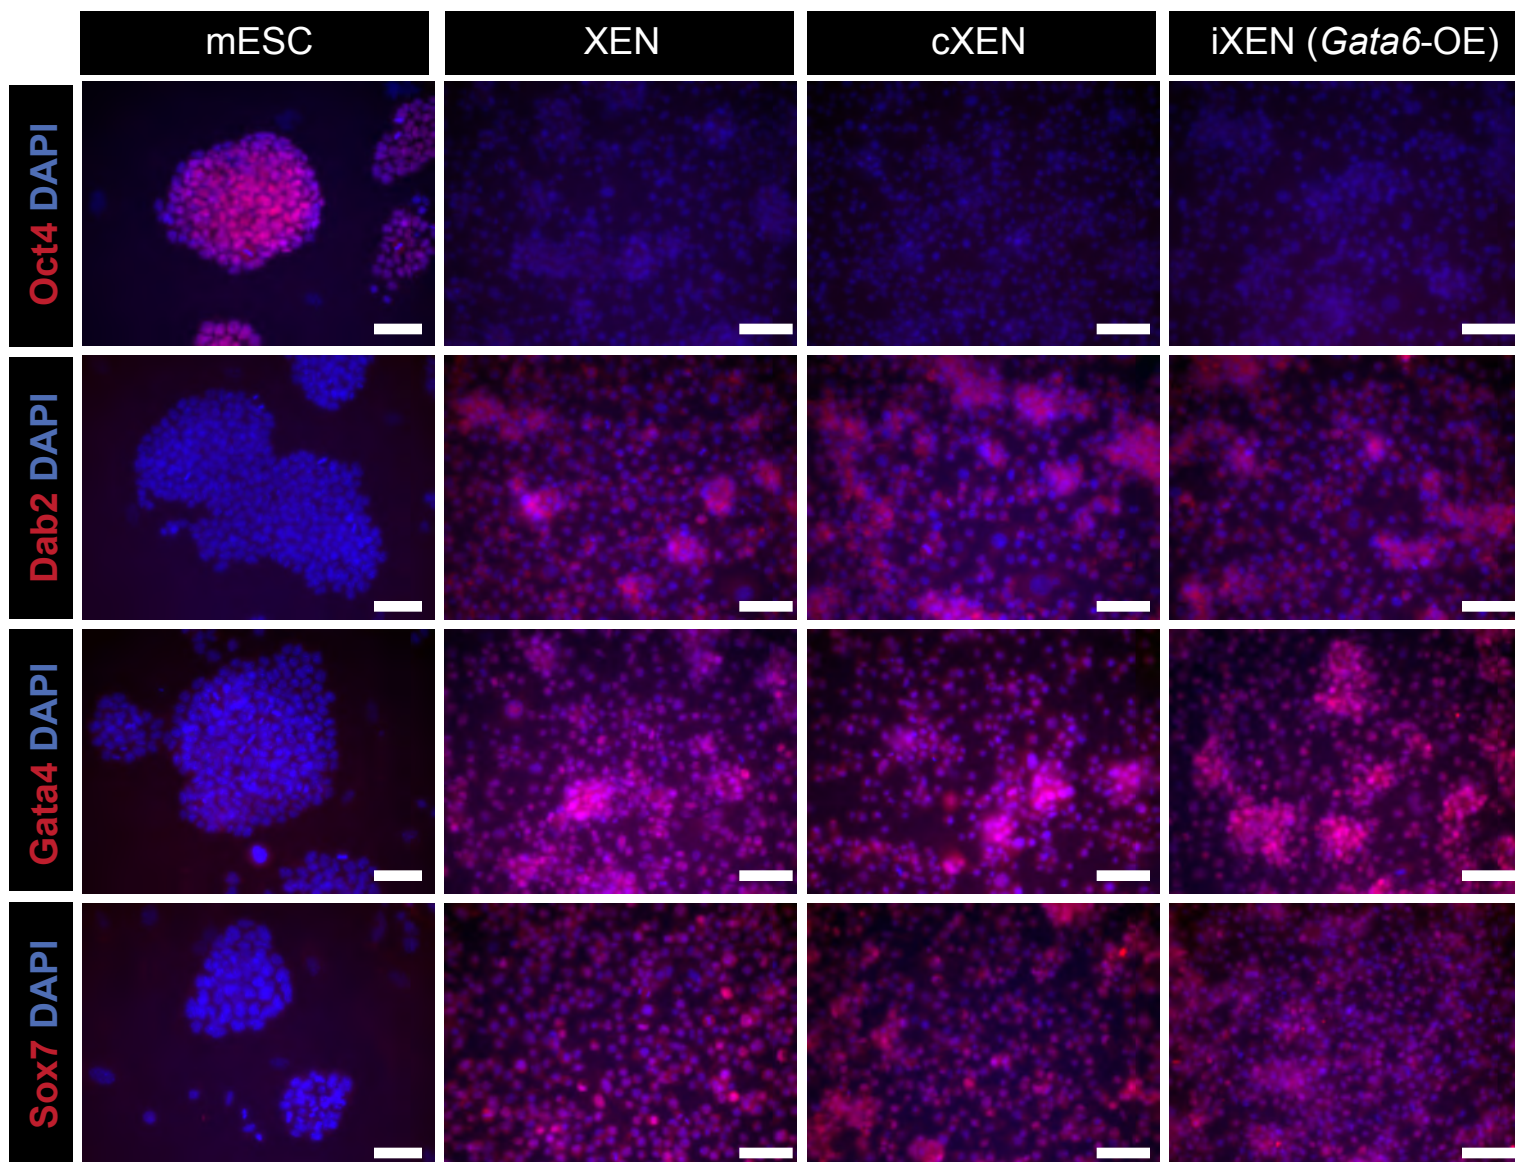

Molecular characteristics of XEN cell lines. Immunofluorescence analysis of mouse ES cells (mESC), embryo-derived XEN cells, cXEN cells and iXEN cells generated by *Gata6*-overexpression (OE) in mESCs after 6 days. Cell lines were analyzed for the expression of Oct4 (sc-5279, Santa Cruz Biotech, 1:500), Dab2 (SC-13982, Santa Cruz Biotech, 1:500), Gata4 (SC-9053, Santa Cruz Biotech, 1:500) or Sox7 (MAB2766, R&D, 1:500) (red) with DAPI (blue) merge using the method described in reference 14. Scale bars: 100  $\mu$ m.
